# Supplementary material for: Isolated focal cartilage and labral defects in patients with femoroacetabular impingement syndrome may represent new, unique injury patterns
Source: Springer Nature journal article supplement (doi:10.1007/s00167-018-4861-2), 2018-02-13
Supplement: MOESM2 [file 15461968]

## Sheet: Data Dictionary
Variable Name	Description
Patient_Number	Generic Patient Number
HipLaterality	R = Right, L = Left
Gender	M = Male, F = Female
Age	Age in years
CLJD_Labrum_Beck_Severity	Chondrolabral Junction Damage, Severity of Labral Involvement According to Beck Scale
CLJD_Cartilage_Beck_Severity	Chondrolabral Junction Damage, Severity of Cartilage Involvement According to Beck Scale
CLJD_Cartilage_Posterior_Clock	Chondrolabral Junction Damage, Posterior Clock-Face Reach of Cartilage Involvement
CLJD_Cartilage_Anterior_Clock	Chondrolabral Junction Damage, Anterior Clock-Face Reach of Cartilage Involvement
CLJD_Labrum_Posterior_Clock	Chondrolabral Junction Damage, Posterior Clock-Face Reach of Labral Involvement
CLJD_Labrum_Anterior_Clock	Chondrolabral Junction Damage, Anterior Clock-Face Reach of Labral Involvement
CLJD_width	Chondrolabral Junction Damage, width of cartilage involvement (measured from chondrolabral junction into the acetabulum) in mm
CLJD_length	Chondrolabral Junction Damage, circcumferential length of cartilage involvement in hours on clock face
IACD_Cartilage_ICRS_Severity	Isolated Acetabular Cartilage Damage, Severity of Cartilage Involvement According to ICRS Scale
IACD_Cartilage_Posterior_Clock	Isolated Acetabular Cartilage Damage, Posterior Clock-Face Reach of Cartilage Involvement
IACD_Cartilage_Anterior_Clock	Isolated Acetabular Cartilage Damage, Anterior Clock-Face Reach of Cartilage Involvement
IACD_Width	Isolated Acetabular Cartilage Damage, width in mm
IACD_Length	Isolated Acetabular Cartilage Damage, length in mm
IACD_Area	Isolated Acetabular Cartilage Damage, Area in mm2
IACD_AcetabularLocation	Isolated Acetabular Cartilage Damage, Location as Inner or Outer half of acetabulum
ILD_Labrum_Beck_Severity	Intrasubstance Labral Damage, Severity of Labral Involvement According to Beck Scale
ILD_Labrum_Posterior_Clock	Intrasubstance Labral Damage, Posterior Clock-Face Reach of Labral Involvement
ILD_Labrum_Anterior_Clock	Intrasubstance Labral Damage, Anterior Clock-Face Reach of Labral Involvement
FCD_Cartilage_ICRS_Severity	Femoral Cartilage Damage, Severity of Cartilage Involvement According to ICRS Scale
FCD_Cartilage_Posterior_Clock	Femoral Cartilage Damage, Posterior Clock-Face Reach of Cartilage Involvement
FCD_Cartilage_Anterior_Clock	Femoral Cartilage Damage, Anterior Clock-Face Reach of Cartilage Involvement
FCD_Location	Femoral Cartilage Damage, Location as Peripheral, Central Weighbearing and/or Parafoveal
FCD_Width	Femoral Cartilage Damage, Width in mm
FCD_Length	Femoral Cartilage Damage, Length in mm
FCD_Area	Femoral Cartilage Damage, Area in mm2
AP_LCEA	Lateral Center Edge Angle in degrees, measured on Anteroposterior radiographs
AP_AA	Alpha Angle in degrees, measured on Anteroposterior radiographs
AP_AI	Acetabular Index in degrees, measured on Anteroposterior radiographs
Frog_AA	Alpha Angle in degrees, measured on Frog-leg lateral radiographs
Frog_HNO	Head-neck offset in mm, measured on Frog-leg lateral radiographs
Acetabuloplasty	1 if patient underwent Acetabuloplasty
FemoralOsteochondroplasty	1 if patient underwent Femoral Osteochondroplasty
CapsularRepairforInstability	1 if patient underwent Capsular Repair for Instability

## Sheet: Data
Patient_Number	HipLaterality	Gender	Age	CLJD_Labrum_Beck_Severity	CLJD_Cartilage_Beck_Severity	CLJD_Cartilage_Posterior_Clock	CLJD_Cartilage_Anterior_Clock	CLJD_Labrum_Posterior_Clock	CLJD_Labrum_Anterior_Clock	CLJD_width	CLJD_length	IACD_Cartilage_ICRS_Severity	IACD_Cartilage_Posterior_Clock	IACD_Cartilage_Anterior_Clock	IACD_Width	IACD_Length	IACD_Area	IACD_AcetabularLocation	ILD_Labrum_Beck_Severity	ILD_Labrum_Posterior_Clock	ILD_Labrum_Anterior_Clock	FCD_Cartilage_ICRS_Severity	FCD_Cartilage_Posterior_Clock	FCD_Cartilage_Anterior_Clock	FCD_Location	FCD_Width	FCD_Length	FCD_Area	AP_LCEA	AP_AA	AP_AI	Frog_AA	Frog_HNO	Acetabuloplasty	FemoralOsteochondroplasty	CapsularRepairforInstability
1	R	F	35	Detachment	Malacia	1.5	2.5	1.5	2.5	5	1																		25	38	5	55	4.6		1
2	R	F	48	Full-Thickness tear	Debonding	9	3.5	1	3	10	6.5	2	11	2	7	10	70	Inner				2	7	6	Parafoveal	30	30	900	30	40	3	46	6.9		1
3	R	M	54	Detachment	Cleavage	10	3	12	2.5	15	5																		33	74	2	67	1.9		1
4	R	M	54	Detachment	Debonding	12	3	10	3	14	3																		28	65	13	43	12		1
5	L	F	46	Degeneration	Malacia	12	3	1	2	7	3																		14	44	10	58	4.3		1
6	R	M	24	Normal	Cleavage	11	3			5	4																		32	57	9	59	5		1
7	L	F	24	Full-Thickness tear	Debonding	12.5	3.5	12.5	2.5	12	3																		36	50	0	53	4.7	1	1
8	R	F	23	Degeneration	Debonding	12	3.5	8	10	10	3.5																		34	52	0	44	6.9		1
9	R	F	30																Full-Thickness tear	1.5	2.5								19	38	7	50	5.1		1	1
10	L	M	24	Detachment	Debonding	9	3	12	2	13	6																		31	67	18	47	7		1
11	L	F	51	Normal	Malacia	12	3			5	3																		28	43	4	46	6.9		1	1
12	L	M	19	Degeneration	Cleavage	12	2.5	12.5	2	12	2.5																		26	61	9	76	7		1
13	R	M	43	Degeneration	Debonding	12.5	3	1	2.5	12	2.5																		33	78	5	49	6.9		1
14	L	F	53	Degeneration	Debonding	12	3	12	2.5	12	3																		24	69	10	48	5.5		1
15	R	M	17	Normal	Malacia	10	2.5			12	4.5																		30	41	12	51	7		1
16	R	F	55	Normal	Malacia	10	2.5			12	4.5											2	9	1	Parafoveal	15	5	75	11	47	15	46	8.5		1
17	R	F	41	Degeneration	Malacia	10	3	11.5	3	5	5																		25	44	3	49	6.7		1	1
18	R	F	48	Detachment	Debonding	12	3	12	3	10	3																		20	38	10	58	3		1
19	R	M	21	Normal	Malacia	11.5	3			8	3.5																		25	47	9	70	2.3		1
20	L	F	56	Degeneration	Debonding	11	3	12	3	10	4																		30	43	0	41	9		1
21	L	F	53	Detachment	Debonding	10	3	12	3	14	5											2	9	3	Parafoveal	20	25	500	21	40	11	36	10.4		1	1
22	R	F	29	Normal	Malacia	12	1.5			4	1.5																		21	41	5	40	7.8		1	1
23	R	F	23	Normal	Malacia	12	2.5			8	2.5																		18	37	13	33	13.1		1	1
24	R	M	47	Degeneration	Defect	11	3.5	1.5	2.5	7	4.5											3	2.5	2.5	Central Weightbearing	4	8	32	33	95	1	76	0.5		1
25	R	F	25	Normal	Malacia	12	3			9	3																		18	32	0	44	8.5		1
26	R	F	46	Degeneration	Malacia	10	3	1	2	8	5																		34	37	2	47	6.7		1
27	R	F	27	Normal	Malacia	11.5	2.5			5	3																		22	47	2	44	6.6		1	1
28	R	M	35	Detachment	Cleavage	9	3	12	3	15	6																		27	79	7	78	0.6		1
29	R	F	56	Detachment	Debonding	1.5	3.5	1.5	3	6	2																		34	41	0	59	3.1		1
30	R	F	24																Degeneration	12.5	3								44	41	-8	45	7	1	1
31	L	F	27	Normal	Malacia	11	2.5			9	3.5																		22	41	6	44	6.9		1
32	L	F	26	Detachment	Debonding	12	2	12.5	1.5	6	2																		28	47	3	42	7.5		1
33	L	F	23	Full-Thickness tear	Cleavage	12.5	3.5	12	3.5	8	3																		25	41	6	68	1.5		1
34	R	M	21	Full-Thickness tear	Debonding	11	3	12.5	2.5	12	4																		39	79	0	79	0.3		1
35	R	M	58	Normal	Cleavage	10	3			12	5																		28	62	1	44	8.6		1
36	R	F	22	Detachment	Debonding	12	4	2	3	15	4																		25	36	9	34	10.6		1	1
37	L	M	46	Detachment	Defect	11	3	12.5	2.5	20	4											2	9	3	Parafoveal and Central Weightbearing	10	30	300	22	50	7	59	3.6		1
38	L	M	32	Full-Thickness tear	Debonding	12.5	2.5	11.5	1.5	5	2																		22	48	9	48	8.1		1
39	L	F	21	Degeneration	Malacia	10	3	1	2	10	5																		24	44	1	35	9.2		1
40	L	F	25	Normal	Malacia	10	3			11	5																		27	45	3	40	9.5		1
41	L	M	26	Normal	Malacia	11	2.5			10	3.5																		26	48	6	57	5.1		1
42	R	M	29	Normal	Malacia	10.5	2.5			10	4																		29	40	6	41	9.8		1
43	L	F	21	Normal	Malacia	11	3			10	4																		26	51	-3	43	8.4		1	1
44	L	F	39	Detachment	Cleavage	11	3	1	2	12	4																		22	39	7	55	5.3		1
45	R	M	44	Detachment	Cleavage	9	3	12	3	11	6																		25	70	12	65	1.9		1
46	L	M	23	Full-Thickness tear	Defect	1	2.5	12.5	3	15	1.5																		32	90	0	68	1.6		1
47	R	F	23	Normal	Malacia	12	3			8	3																		32	41	7	49	5.7		1
48	L	F	38	Degeneration	Debonding	11	3	1	2.5	8	4																		19	45	8	58	3.2		1
49	R	M	25	Degeneration	Debonding	9	3	12	3	12	6											1	10	2	Central Weightbearing	10	10	100	28	76	2	71	2		1
50	R	F	25	Detachment	Debonding	10	3	1	3	10	5																		34	47	5	55	4		1
51	R	M	16	Detachment	Cleavage	11	2.5	1	2.5	11	3.5																		31	68	1	78	0.4		1
52	R	F	53	Detachment	Debonding	11	3	1	2.5	10	4																		12	47	15	57	4		1	1
53	R	F	40	Detachment	Debonding	1	2.5	1	2.5	7	1.5																		15	37	16	70	1.9		1
54	R	M	18	Normal	Cleavage	11.5	3			9	3.5																		31	88	0	75	0.5		1
55	R	M	40	Full-Thickness tear	Debonding	1	2.5	12	3	8	1.5																		20	41	6	41	9.8		1
56	R	F	26	Degeneration	Debonding	11.5	3	1	2.5	10	3.5																		30	35	5	38	9.2		1	1
57	R	F	49	Detachment	Debonding	12	3	12	2.5	12	3											2	9	3.5	Parafoveal	30	20	600	20	22	10	61	1.8		1	1
58	R	F	29	Degeneration	Malacia	12	3	1	2	10	3											2	11	1	Parafoveal	10	10	100	21	43	4	40	7.8		1
59	R	F	19	Normal	Malacia	12	3			8	3																		25	45	7	51	5.3		1
60	R	F	45									4	10	3.5	15	35	525	Inner				3	10.5	3	Central Weightbearing	25	20	500	18	39	10	38	9.4		1
61	R	M	58	Degeneration	Debonding	12	2.5	1	2.5	11	2.5																		26	40	5	39	10.2		1
62	L	M	44	Normal	Debonding	10	3			9	5																		13	30	15	54	4.9		1
63	L	F	23	Normal	Malacia	11	2.5			6	3.5																		28	43	6	48	6.8		1
64	L	M	51	Detachment	Debonding	12	3	12	3	10	3																		28	50	5	48	6.6		1
65	R	F	26	Detachment	Debonding	12	3	1	2	9	3																		27	37	7	42	8.4		1
66	R	M	22	Degeneration	Cleavage	11	3	12.5	2	13	4																		29	75	5	55	4.4		1
67	R	F	58	Degeneration	Cleavage	11	3	12	3	15	4											2	9	4	Parafoveal	15	30	450	27	39	9	55	4.4		1
68	R	M	55	Degeneration	Debonding	11	3	11	2	10	4																		22	71	13	63	4.6		1
69	R	F	24	Normal	Cleavage	12	3			6	3																		29	41	5	60	3.2		1
70	L	F	36	Detachment	Debonding	10	3	1	3	10	5																		26	38	7	66	4.7		1	1
71	L	F	45	Degeneration	Debonding	11	3	12	2	10	4																		20	74	8	68	1.9		1
72	R	M	42	Detachment	Debonding	12	3	1	2	8	3																		15	45	15	43	9.2		1
73	L	M	46	Detachment	Debonding	10	3	12	3	9	5																		38	48	-3	57	4.4	1	1
74	L	M	36	Normal	Cleavage	12	3			10	3																		21	76	10	62	3.2		1
75	R	F	28	Normal	Debonding	11	3			12	4																		25	44	3	37	9.4		1
76	L	F	18	Degeneration	Malacia	9	3	9	11	6	6																		28	51	5	53	4.3		1
77	L	F	38	Normal	Debonding	11	3			8	4																		28	43	2	36	9.2		1
78	L	M	24	Degeneration	Debonding	1	3.5	1	3.5	8	2.5																		28	87	5	79	0.3		1
79	R	M	53	Detachment	Cleavage	10.5	3	12	2.5	7	4.5																		26	55	4	70	1.8		1
80	L	M	32	Normal	Malacia	9	2			8	5																		34	67	2	44	8.3		1
81	R	M	56	Detachment	Defect	10	3	12	3	10	5																		29	68	4	84	0.2		1
82	R	M	29	Detachment	Cleavage	11.5	3.5	11	2	8	4																		19	54	16	58	4		1
83	R	F	44	Normal	Malacia	10	3			5	5																		16	40	14	43	7.8		1	1
84	R	F	36	Normal	Malacia	12	2			5	2																		30	41	5	52	5.5		1
85	R	F	40	Full-Thickness tear	Cleavage	11	2.5	11	3	15	3.5																		28	46	5	58	4.2		1
86	R	F	23	Normal	Malacia	12	2.5			8	2.5																		31	40	-8	35	11.4		1	1
87	R	M	21	Detachment	Cleavage	9	3	1	2.5	8	6																		24	76	8	74	0.7		1
88	L	F	22	Degeneration	Defect	9	3	12	2	13	6																		33	39	7	59	3.3		1	1
89	R	F	33	Full-Thickness tear	Malacia	12	2.5	1.5	2.5	10	2.5																		31	39	0	59	3.9		1	1
90	L	F	21	Normal	Malacia	11	2			8	3																		23	42	12	46	5.8		1
91	R	F	36	Detachment	Debonding	11	3	1	2.5	10	4																		18	44	8	51	5.3		1	1
92	R	F	24	Normal	Debonding	10	3			15	5																		29	46	7	35	10.1		1
93	L	F	25	Detachment	Debonding	11.5	3	12	2.5	6	3.5																		21	31	1	43	8.1		1	1
94	R	F	46	Detachment	Debonding	11.5	3	1.5	3	8	3.5																		18	40	10	40	9.1		1	1
95	L	M	29	Full-Thickness tear	Cleavage	9	3	12	2.5	12	6																		28	69	8	61	3.9		1
96	R	M	23	Normal	Debonding	11	3			12	4																		37	82	-3	79	0.4		1
97	L	F	24	Normal	Malacia	12	1.5			5	1.5																		32	37	0	44	6.9		1
98	L	F	18	Degeneration	Malacia	12	3	12.5	2.5	8	3																		29	52	3	52	6.1		1
99	R	F	46	Degeneration	Cleavage	9	2.5	1	2	11	5.5																		10	67	19	59	3.7		1	1
100	R	M	22	Detachment	Defect	9	3	11	3	15	6																		29	78	5	73	0.8	1	1
